# Supplementary material for: Graphene: a novel template for controlling the microstructures of mesoporous silica
Source: Royal Society of Chemistry journal article supplement (doi:10.1039/c1jm11942g), 2011-01-01
Supplement: c1jm11942g.pdf [file c1jm11942g.pdf]

Supporting information for

**Graphene: a novel template for controlling the  
microstructures of mesoporous silica**

*Ying-Feng Lee,<sup>a,z</sup> Kuo-Hsin Chang,<sup>a,b,z</sup> Chi-Chang Hu,<sup>\*a</sup> and Ying-Hui Lee<sup>a</sup>*

<sup>a</sup> Laboratory of Electrochemistry and Advanced Materials, Department of Chemical Engineering, National Tsing Hua University, Hsin-Chu, 30013 TAIWAN.

Fax: +886-3-5715408; Tel: +886-3-5736027

<sup>b</sup> Department of Chemical Engineering, National Chung Cheng University, Chia-Yi, 621 TAIWAN

<sup>z</sup> Authors contributed equally to this work. \* To whom correspondence should be addressed.

E-mail: [cchu@che.nthu.edu.tw](mailto:cchu@che.nthu.edu.tw)

This supporting information includes Figures S1 – S4.

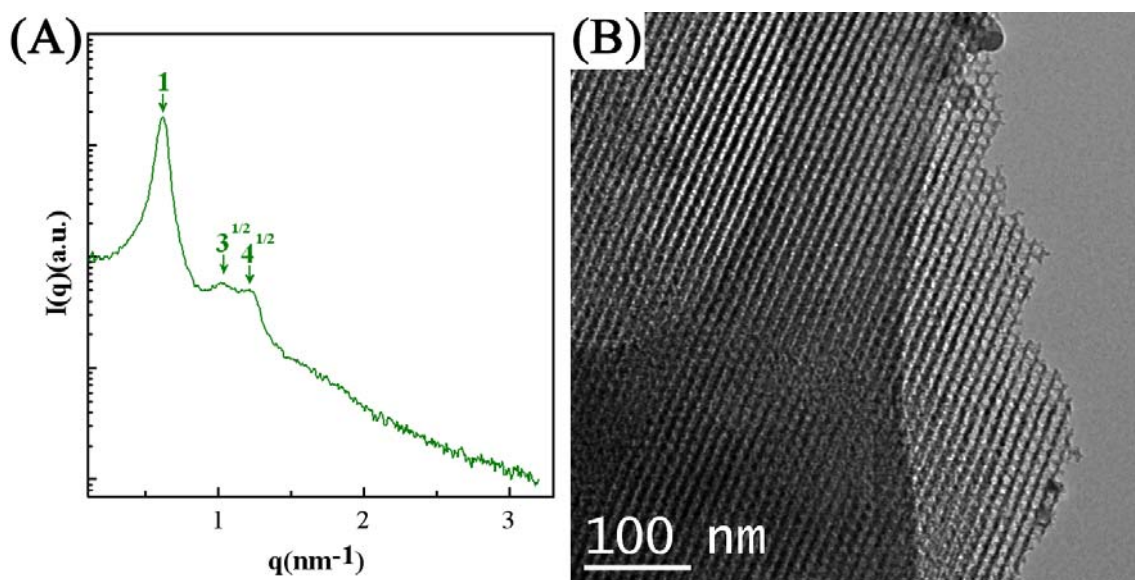

**Figure S1** (A) A small-angle x-ray scattering pattern and (B) a TEM image of the silica template derived from SC600 by removing graphene sheets through additional heating in air at 500 °C for 1 h.

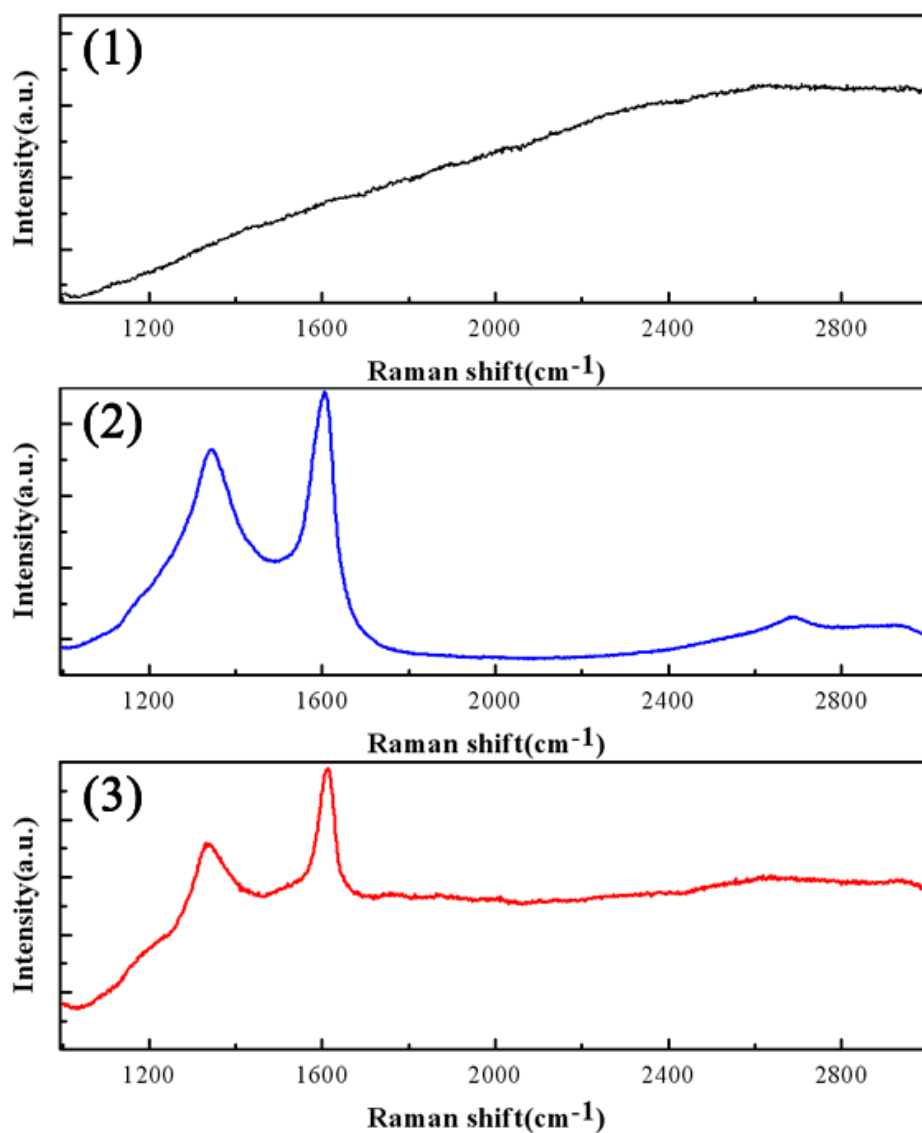

**Figure S2** Micro-Raman spectra of the carbonaceous materials derived from the removal of silica from (1) SC450, (2) SC600, and (3) SC800.

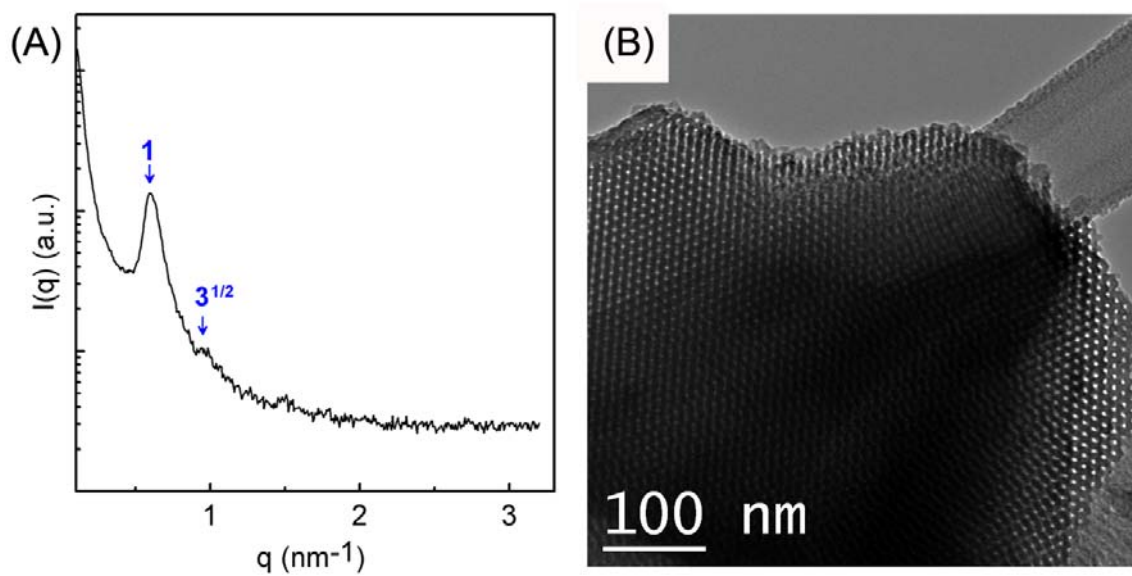

**Figure S3** (A) The SAXS pattern and (B) TEM image of an aged, self-assembled precursor mixture.

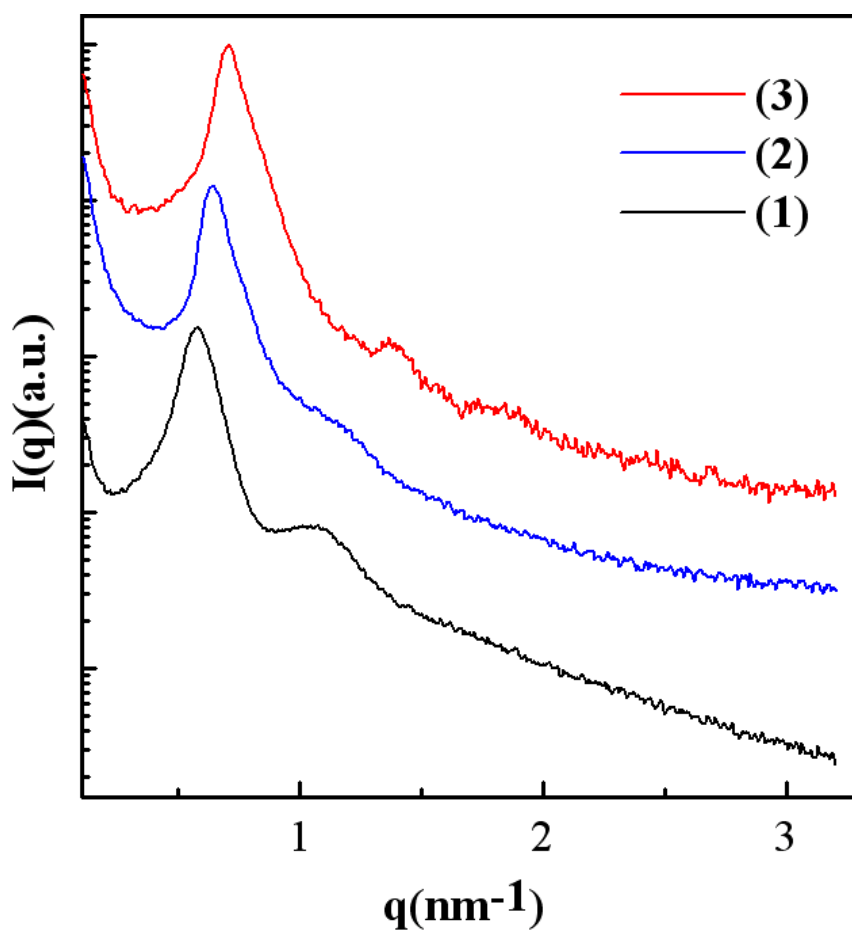

**Figure S4** The small-angle X-ray scattering patterns of silica-carbon nanocomposites obtained from carbonization of the self-assembled precursor without cobalt chloride at (1) 450, (2) 600, and (3) 800 °C.
